# Supplementary material for: Dose of antivenom for the treatment of snakebite with neurotoxic envenoming: Evidence from a randomised controlled trial in Nepal
Source: PLOS journal article supplement (doi:10.1371/journal.pntd.0005612), 2017-05-16

## Low initial dose regimen

2 vials in 20 ml push

If signs deteriorate 2 vials in 50 ml push

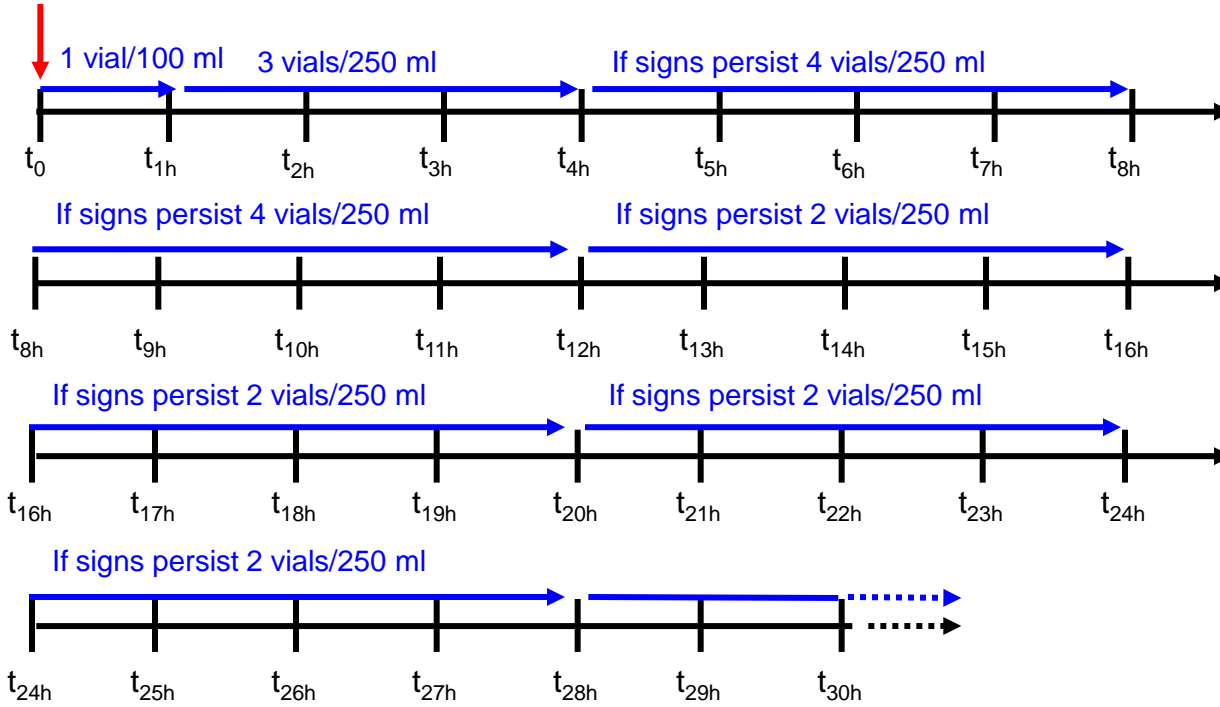

## High initial dose regimen

2 vials in 20 ml push

If signs deteriorate 5 vials in 50 ml push

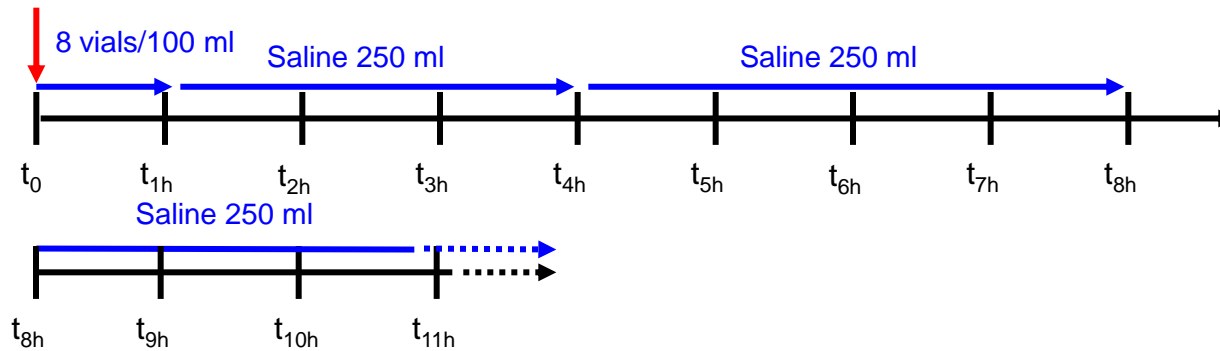

Supplement: S2 (10.1371/journal.pntd.0005612.s002) [file journal.pntd.0005612.s002.pdf]
